# Supplementary material for: Tea-derived carbon dots with two ratiometric fluorescence channels for the independent detection of Hg2+ and H2O
Source: Royal Society of Chemistry journal article supplement (doi:10.1039/d2ay01768g), 2023-01-01
Supplement: d2ay01768g1.pdf [file d2ay01768g1.pdf]

# Tea derived carbon dots with two ratiometric fluorescence channels for independent detection of $\text{Hg}^{2+}$ and $\text{H}_2\text{O}$

Chuanlu Ding<sup>a</sup>, Hao Xing<sup>a</sup>, Xuhong Guo<sup>a,b</sup>, Huihui Yuan<sup>c</sup>, Cuihua Li<sup>\*,a</sup>, Xiulan Zhang<sup>\*,a</sup>, Xin Jia<sup>\*,a</sup>

<sup>a</sup> School of Chemistry and Chemical Engineering/Key Laboratory for Green Processing of Chemical Engineering of Xinjiang Bingtuan, Key Laboratory of Materials-Oriented Chemical Engineering of Xinjiang Uygur Autonomous Region, Engineering Research Center of Materials-Oriented Chemical Engineering of Xinjiang Bingtuan, Shihezi University, Shihezi 832003, People's Republic of China

<sup>b</sup> State Key Laboratory of Chemical Engineering, East China University of Science and Technology, Shanghai 200237, People's Republic of China

<sup>c</sup> Shanghai Key Laboratory of Functional Materials Chemistry, School of Chemistry & Molecular Engineering, East China University of Science and Technology, Shanghai 200237, China

*E-mail: xl\_zhang@shzu.edu.cn (X. Zhang); jiaxin@shzu.edu.cn (X. Jia); lich@shzu.edu.cn (C. Li)*

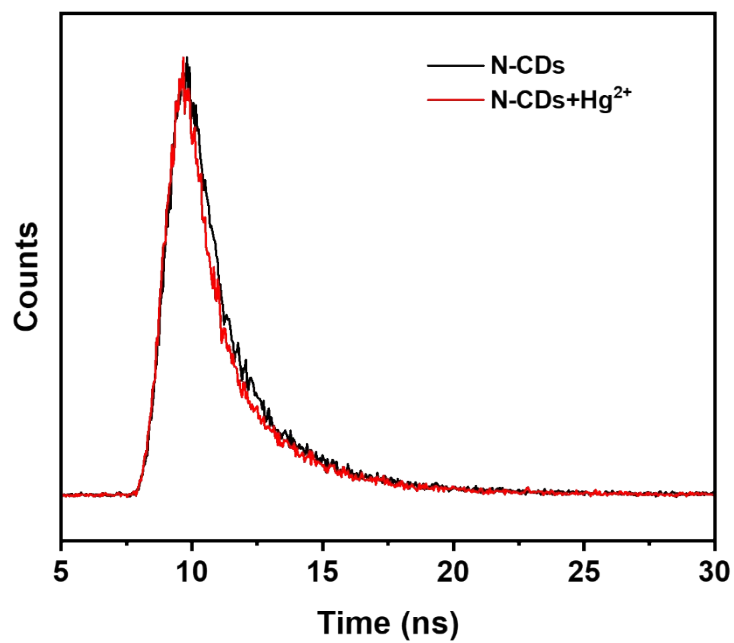

Fig. S1 Time-resolved fluorescence decay curve of N-CDs and N-CDs+Hg<sup>2+</sup>.

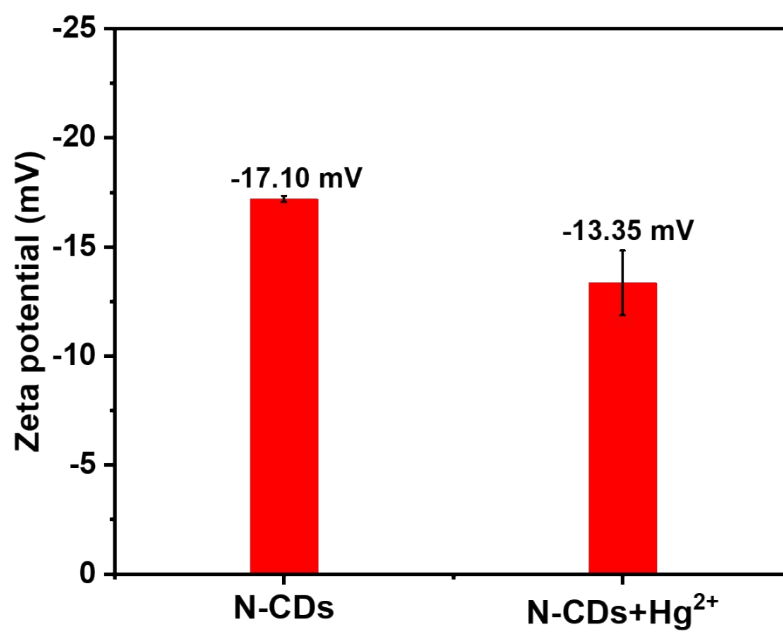

Fig. S2 Zeta potential value of N-CDs and N-CDs+Hg<sup>2+</sup>.

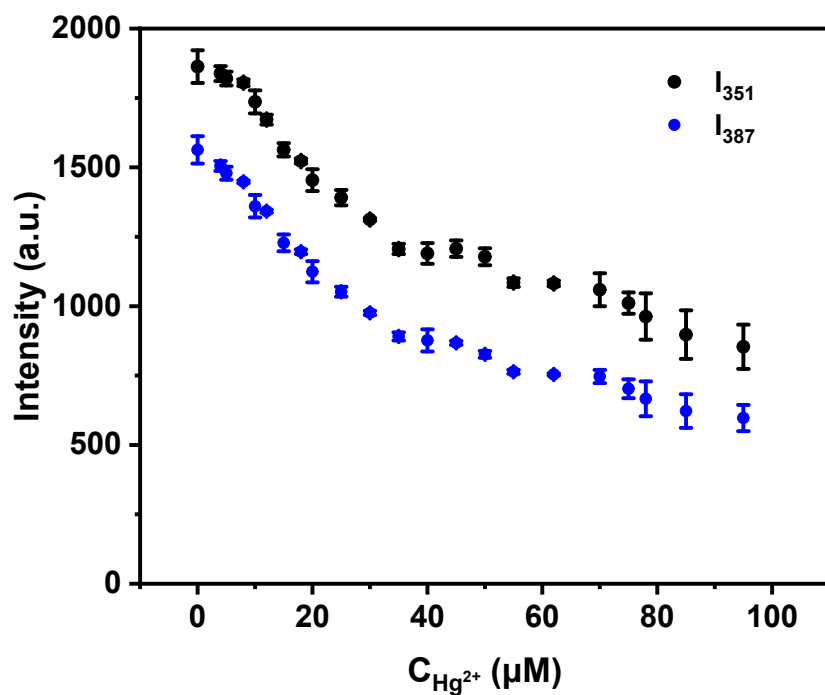

Fig. S3  $I_{351}$  and  $I_{387}$  value of N-CDs changes with concentrations of  $\text{Hg}^{2+}$ .

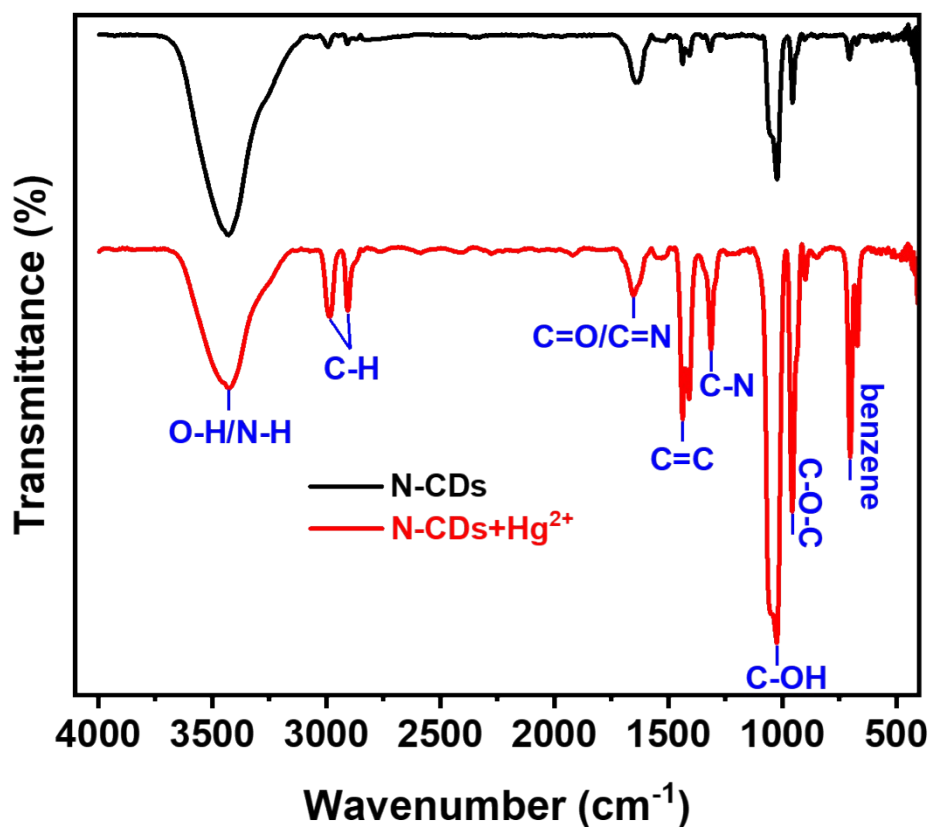

Fig. S4 FTIR spectra of N-CDs and N-CDs+ $\text{Hg}^{2+}$ .

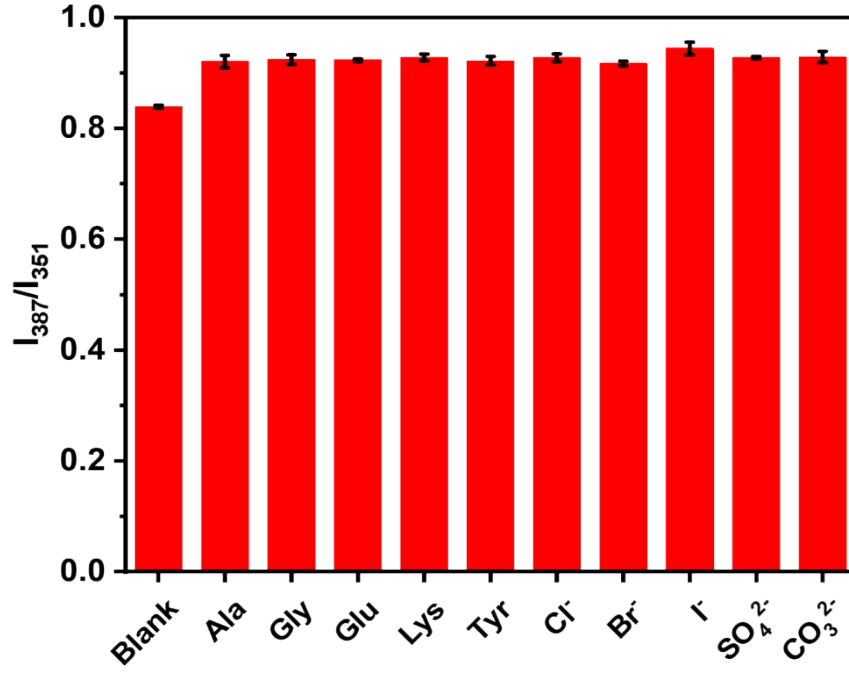

Fig. S5  $I_{387}/I_{351}$  values for interference ions (50  $\mu$ M) mixture with N-CDs.

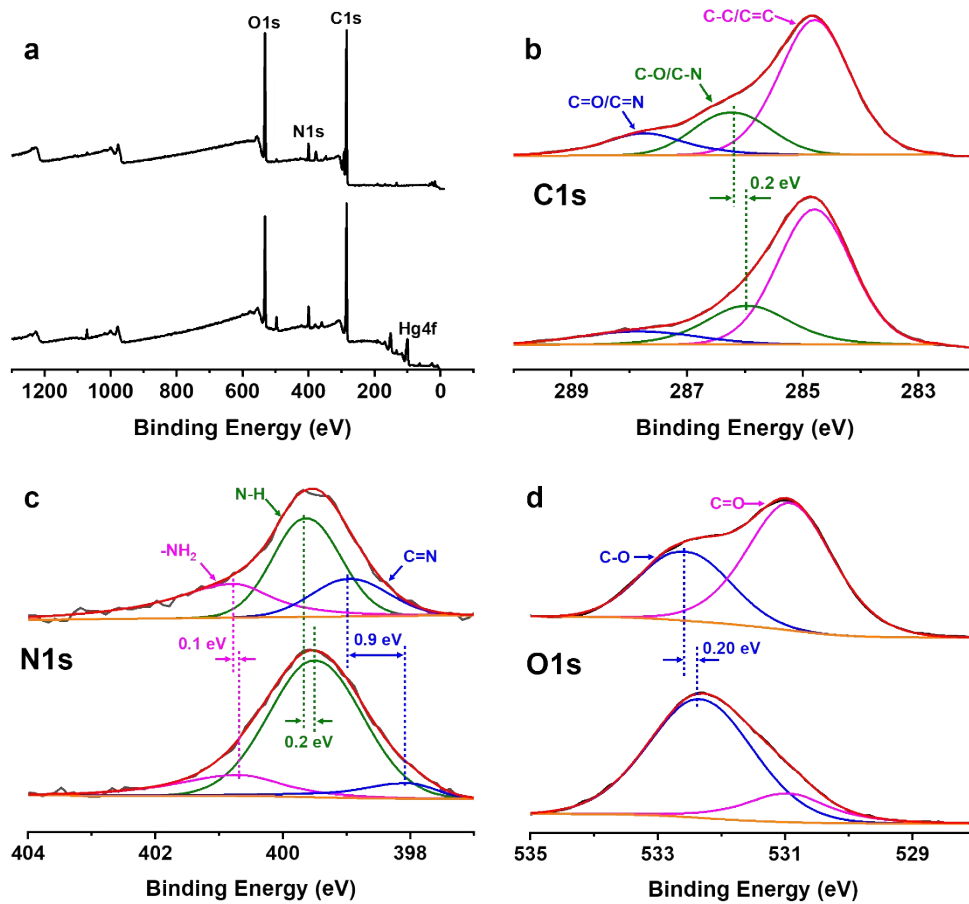

Fig. S6 (a) XPS spectra, (b) XPS C1s spectra, (c) XPS N1s spectra, (d) XPS O1s spectra of N-CDs (upper spectra) and N-CDs+Hg<sup>2+</sup> (nether spectra).

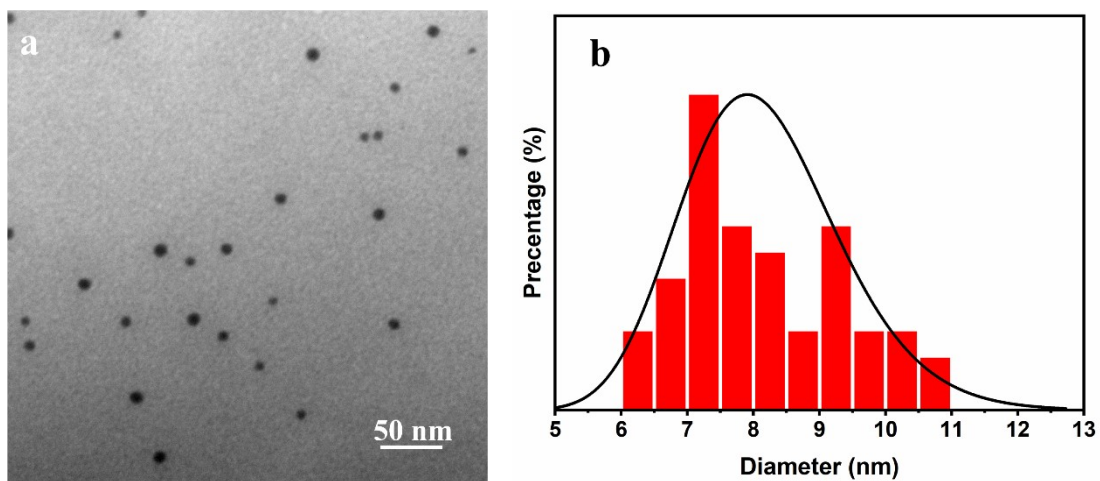

Fig. S7 (a) TEM image, (b) Particle size distribution analysis of N-CDs+Hg<sup>2+</sup>.

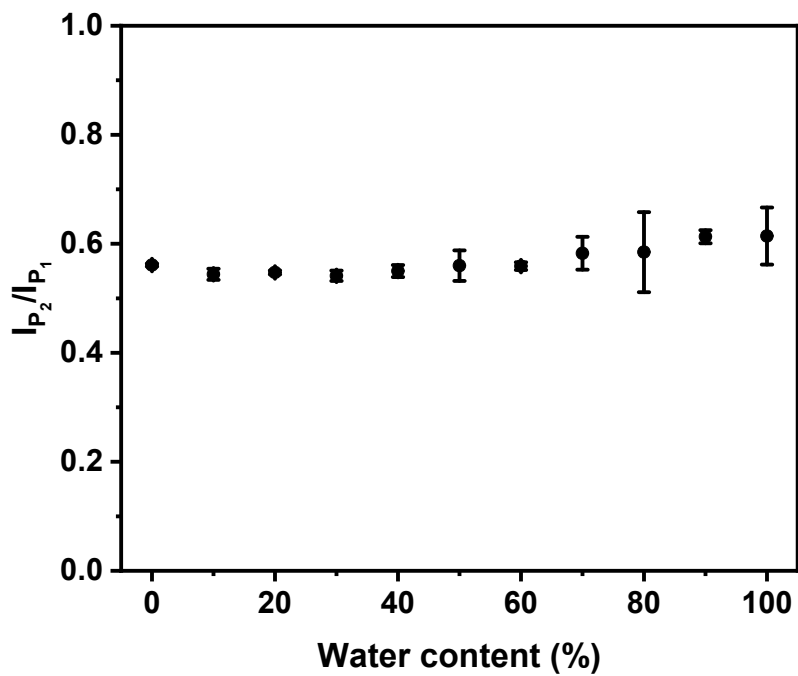

Fig. S8 Plot of  $I_{P_2}/I_{P_1}$  versus the water content in ethanol, where P2 and P1 is the fluorescence emission peak around 387 nm and 351 nm, respectively.
